# Supplementary material for: Supportive care needs of women with breast cancer in rural Scotland
Source: Springer Nature journal article supplement (doi:10.1007/s00520-014-2501-z), 2014-11-14
Supplement: MOESM1 [file 8575166]

**My experiences of being a service user co-researcher on the Remote and Rural project**

**Alison Walker, Service User Research Partnership, Breast Cancer Care**

When I was diagnosed with breast cancer in 2007 I referred to Breast Cancer Care’s literature in order to increase my knowledge about the disease.

As I recovered from breast cancer, I wanted to give something back to Breast Cancer Care (http://www.breastcancercare.org.uk/) but knew I had to wait for 18 months post diagnosis before I could volunteer with the charity. Around 9 months following my diagnosis I was asked if I would like to be the consumer representative for a phase 3 clinical trial which was trying to find out if radiotherapy should be used for ladies who are at an intermediate risk of their breast cancer recurring after having a mastectomy. My role as consumer representative was to ensure that the information was patient friendly and that the clinical trial team took account of the needs of ladies.

I was keen to improve my knowledge of breast cancer and to address this, I was fortunate to receive funding from the National Breast Cancer Coalition to attend Project Lead (http://www.breastcancerdeadline2020.org/get-involved/training/project-lead/) in 2009. This was a 5 day training course which covered the basics of cancer biology, epidemiology and research design. As a result of attending the course, both my levels of knowledge and understanding had increased when engaging with the medical professionals.

In 2010 I applied to be a member of Breast Cancer Care’s Service User Research Partnership (SURP). SURP was formed in 2007 to ensure the charity’s research and evaluation programme reflects the needs and experiences of people affected by breast cancer.

During 2013 one of SURP’s goals was to plan and develop opportunities for SURP members to use their research skills in undertaking different elements of the research process. Around this time Gill Hubbard, Reader & Co-Director of the Cancer Care Research Centre based at the University of Stirling approached Karen Scanlon, Research Manager at Breast Cancer Care and myself to see if I would be interested in interviewing ladies who had had breast cancer, who lived in remote and rural areas and had had some involvement with Breast Cancer Care. The aim of the study was to identify ways of enhancing the support and information available to patients during or after treatment on managing the physical, emotional, social and financial consequences of breast cancer.

Whilst I was really pleased to be asked to help out with this study, I was also conscious that I did not have a lot of spare time. Christine Venning, another SURP member living close was persuaded to get involved. For me, I felt it was a chance to develop further skills – interviewing, analysing and writing.

Christine and myself were given the task of developing the interview questions to enable us to establish what were the most prevalent supportive care needs that the ladies reported in the questionnaire. Neither of us had had experience of conducting qualitative interviews and Gill Hubbard agreed to facilitate a session to enable us to develop interview questions for people affected by cancer. During the training we were taught the importance of using open ended questions to enable the interviewees to respond in their own terms.

When we received the spreadsheet provided by Breast Cancer Care with the details of the ladies who we were to interview both Christine and myself were puzzled to see that there were far fewer ladies listed on the spreadsheet than we had previously thought. In addition a high percentage of the data was incorrect including missing telephone numbers and incorrect telephone numbers. Looking back, I believe this task would have been much easier had more time been given to ensure that the data was accurate.

We both really enjoyed interviewing the ladies and we both benefitted from having a trial run of the interview questions with fellow SURP members and this allowed us to ensure that the questions flowed and how long it would take to complete the interviews. Gill’s secretary transcribed the interviews into written form for us.

Once we had the transcripts, we met up with Gill to look at how to do thematic coding. This enabled us to index the text from the interviews in a theoretical way rather than simply approaching it with a descriptive focus. From this, we could establish what the main emerging themes were from the interviews. I particularly enjoyed the coding which was completed on 31 December 2013.

However, the next time Christine and I were due to meet Gill was 11 February 2014. As a result of waiting, I felt I lost the momentum and I would have liked this meeting to have been scheduled far sooner. After this meeting, I flew off to America for a fortnight and returned to the UK with a viral infection which took 4 weeks to clear up. It took me all my energy to continue working almost full-time.

When I did return to RAR, I found it difficult to continue where I had left off and my interest had waned. Looking back, I believe I would have benefitted from a monthly teleconference call with all involved to address any issues. In addition I would have liked a more structured approach with deadline dates. Sometimes I found it hard coming home after work to start doing RAR, had I had deadline dates I think I would have enjoyed the challenge more.

Towards the end of RAR, I did enjoy working on the recommendations and seeing the finished report. Overall I believe:

- It was a great opportunity to work and learn from people as experienced as Gill and Karen and I also really enjoyed working with Christine.
- I really liked interviewing the ladies who were so open and honest about their experiences and also doing the thematic coding.
- I wished I had asked more questions at the start regarding the level of involvement because this was considerably more than I had originally envisaged.
- Going forward I would like to build on the knowledge gained in order to improve my research skills and get involved with another study in the future.
